# Supplementary material for: Loss of BAF Complex in Developing Cortex Perturbs Radial Neuronal Migration in a WNT Signaling-Dependent Manner
Source: Front Mol Neurosci. 2021 Jun 16;14:687581. doi: 10.3389/fnmol.2021.687581 (PMC8243374; doi:10.3389/fnmol.2021.687581)
Supplement: Supplementary file 3 [file Table_3.XLSX]

## Sheet: Sheet1
GO biological process complete	Mus musculus - REFLIST (22320)	upload_1 (998)	upload_1 (expected)	upload_1 (over/under)	upload_1 (fold Enrichment)	upload_1 (P-value)
biological_process (GO:0008150)	20668	970	924.13	+	1.05	2.15e-06
single-organism process (GO:0044699)	12188	631	544.97	+	1.16	0.000158
synaptic transmission (GO:0007268)	320	38	14.31	+	2.66	0.000837
establishment of localization (GO:0051234)	3295	208	147.33	+	1.41	0.00112
transport (GO:0006810)	3170	201	141.74	+	1.42	0.00142
regulation of biological quality (GO:0065008)	2643	173	118.18	+	1.46	0.00175
single-organism behavior (GO:0044708)	418	44	18.69	+	2.35	0.00233
localization (GO:0051179)	4100	244	183.32	+	1.33	0.0077
regulation of localization (GO:0032879)	2246	148	100.43	+	1.47	0.0107
positive regulation of biological process (GO:0048518)	4910	282	219.54	+	1.28	0.0156
regulation of transport (GO:0051049)	1676	116	74.94	+	1.55	0.0193
behavior (GO:0007610)	564	51	25.22	+	2.02	0.0223
cellular cation homeostasis (GO:0030003)	397	40	17.75	+	2.25	0.0224
cellular metal ion homeostasis (GO:0006875)	354	37	15.83	+	2.34	0.0233
single-organism localization (GO:1902578)	2664	168	119.12	+	1.41	0.0253
cell-cell signaling (GO:0007267)	537	49	24.01	+	2.04	0.0273
response to metal ion (GO:0010038)	194	25	8.67	+	2.88	0.0305
adult behavior (GO:0030534)	157	22	7.02	+	3.13	0.0315
response to calcium ion (GO:0051592)	91	16	4.07	+	3.93	0.0418
cellular ion homeostasis (GO:0006873)	409	40	18.29	+	2.19	0.0446
regulation of secretion by cell (GO:1903530)	629	54	28.12	+	1.92	0.0496
